# Supplementary material for: A novel classification predicts prognosis and drug sensitivity in osteosarcoma based on alterations in gene sets
Source: Aging (Albany NY). 2024 Feb 28;16(5):4579–90. doi: 10.18632/aging.205614 (PMC10968677; doi:10.18632/aging.205614)
Supplement: Supplementary Table 1 [file aging-16-205614-s001.xlsx]

## Sheet: Supplementary Table 1
Supplementary Table 1. Drug sensitivity analysis of osteosarcoma.
,"Camptothecin_1003","Vinblastine_1004","Cisplatin_1005","Cytarabine_1006","Docetaxel_1007","Gefitinib_1010","Navitoclax_1011","Vorinostat_1012","Nilotinib_1013","Olaparib_1017","Axitinib_1021","AZD7762_1022","SB216763_1025","KU-55933_1030","Afatinib_1032","Staurosporine_1034","PLX-4720_1036","NU7441_1038","Doramapimod_1042","Wee1 Inhibitor_1046","Nutlin-3a (-)_1047","Mirin_1048","PD173074_1049",…
TARGET-40-PASUUH-01A,0.00841619922551413,0.0011754726261121,1.13727417610049,1.4134671282635,0.00325774874976241,32.3047179420066,4.20673459098631,10.1152749662658,43.6641729362273,59.4875325357573,36.104505625039,0.357018271140527,196.627506082068,88.391664369328,1.83555084136871,0.00866649389967032,42.7894135879716,13.13898590911,110.609904918322,8.84232728011145,13.7607627836562,92.23185216667…
TARGET-40-PAUTWB-01A,0.193679520997556,0.00899375513312654,8.74850429210064,0.842524154214857,0.0037671422431934,4.43469095325265,0.00792643957134542,0.269005611355429,2.89318422457247,144.41782256585,23.831547739491,0.0948812687606722,153.22099487299,109.481652655721,2.55069670753879,0.0515364371308834,41.7707440242655,16.6226998854082,80.3602502122098,1.75405621374253,1.16655737025058,68.553569…
TARGET-40-PAKUZU-01A,0.181870075523622,0.0354012726034021,16.0372110822774,5.0059821023228,0.00588209034691673,3.71877893174668,0.0250340199443817,0.443665927308051,6.02687158239632,82.3801174410454,15.9520936953137,0.449124126419884,150.274972162403,78.7302300503003,3.52974566637278,0.126600009574162,28.9440546881691,12.7382711031469,49.5765119420966,2.89198704565114,2.88068366360774,83.75686306…
TARGET-40-0A4I0S-01A,0.105298286636467,0.0210663670056729,25.0477387289153,1.87592313141087,0.0414271598618052,30.1394699355571,72.2530593595456,16.0772815379859,72.0213141626189,131.913704258798,31.0171791908964,1.1453245107052,139.336116815047,66.3894117143772,4.10195086566217,0.0114338646627265,107.918111916284,8.59545517373016,98.0223979095347,25.2902297917907,192.436229063284,208.11717623475…
TARGET-40-PARJXU-01A,0.00676376015052262,0.0357336195862095,20.8879831049962,13.4799663601203,0.0426309054138498,513.124700967507,7213.2438684137,136593.86405694,456.255613871103,45.123512773425,64.3167454729938,6.68491262878912,315.974332541935,75.1838882333901,40.7386585963743,0.00636876046390769,1101.62894222871,9.06398786463786,227.419055036752,101.134808827174,2136.16452029517,223.6088639331…
TARGET-40-PAPWWC-01A,0.000724932067897641,0.00070186068868585,10.4257762143876,0.659999365992817,0.00855862330235654,630.881569759859,22382.122525464,NA,391.962522417801,7.51250189068273,66.1503862244132,2.10577639170827,277.448657093686,86.0379780373051,1.9786790991191,0.00105663392140137,107.536754743927,5.8760159778234,330.576423536648,20.9943698666384,977.311500602369,29.2277155980093,6088.72…
TARGET-40-PAUUML-01A,0.748429277882071,0.0648901648530672,323.295241370879,20.2329441926393,0.00876160687628468,21.7397024522013,3.99664623193487,1.0676887853668,14.3268024044097,92.0306935282067,13.1570221555354,1.2896372209014,243.384878581612,93.7205358840163,9.57829087692235,0.176241683193153,142.126164166318,15.2309577765104,75.7882396111116,3.9330513787284,244.742290932821,75.9344829755634,…
TARGET-40-PAMHLF-01A,0.0914617163218821,0.0034994616632114,6.8840902069817,0.954961356654283,0.00278263134163402,8.17246348690599,0.876510583722511,0.639707098792486,11.6052189996667,99.0370108067762,12.8037889148319,0.306836606384855,170.08252656959,82.2152971309441,4.31763554924684,0.0445194107087471,57.6682854345238,11.5974510203873,67.3885715655455,2.1699001749469,10.0954421945297,52.56160037…
TARGET-40-PAUBIT-01A,0.355530463829032,0.00381309978011636,187.152256220616,9.7692159332375,0.00720870902591528,129.864330641542,90.3264411365377,15.2750458444108,44.809432566054,159.826243387564,16.7148109546633,0.444623295555104,170.623974911388,86.8171786898865,8.49401694341594,0.0321191165943049,377.682645900651,9.93043207950091,166.523884901301,3.80267137918691,208.725685892096,39.7436221130…
TARGET-40-PASFCV-01A,0.0697060456353077,0.00713364386660599,2.57612252567414,8.56353475617033,0.0086908815007279,44.8974652189578,25.3510407259563,8.71887875827703,86.3638571454562,125.934857427767,41.4339551466519,0.945649478665852,174.869465708084,70.9723961284707,7.75795831268208,0.00828812987494109,145.921164186528,11.7610510740315,145.034935800749,21.2133469426234,113.454663630233,200.785380…
TARGET-40-PARDAX-01A,0.0367723806682006,0.143636365562923,87.9182055618769,9.47464318162781,0.0182477394970988,46.8765742577229,10.1486497365561,8.52541354751371,36.1403733857827,41.2858490099925,19.3292163550066,3.24405697848992,229.708374143319,95.9237454578435,12.8771828113964,0.087380456930605,107.989089575334,13.9441152628029,94.0645382921745,6.94811589973976,156.08701885882,98.8531873298268…
TARGET-40-0A4I4O-01A,0.0288745569539969,0.00884797963531189,23.5794245045251,4.96865967157285,0.0103144849279703,68.0914147202667,396.344269885487,419.357888817292,88.2952799374426,28.2200487557622,22.7571257888863,1.69379277854607,299.738487142674,60.3866561369352,5.0583674775553,0.0207488253606168,101.158279093121,5.80312153484282,95.4036164989084,40.1066218965223,428.68891553107,120.7096583688…
TARGET-40-0A4I48-01A,13.2356601542565,0.0408844271167353,5.15728411538333,3.7456101749922,0.00388365431262521,0.956425498064181,0.0108704738940846,0.087450092036701,1.61120114152001,437.176726082531,12.9590224769652,0.0701653883983452,176.277975385424,105.400076083227,4.68891347947561,0.113114330622046,48.2480415613265,25.4416932348128,75.0411453030448,1.99623607178098,3.74420893907476,183.568643…
TARGET-40-PASEFS-01A,0.392685315120228,0.0200945996909903,14.9509445165611,1.38839464362062,0.00387101306216187,4.98318913808155,0.537188269512791,0.633937976551073,5.13354545869277,65.5178105443585,12.0906723075328,0.603062166375217,191.80665797499,127.448542673389,6.83736387383577,0.878662078243088,71.790711029888,22.8829895321535,74.5466338896476,0.873409654910078,36.9227122809393,59.662238184…
TARGET-40-PARKAF-01A,0.0052819277157029,0.00300136519626267,3.3856145348958,0.418706157401327,0.00322264059481657,9.60709512481083,60.039461178045,9.56477881753865,26.1074169075057,13.9271835611671,16.200623330007,0.451477098408355,144.754211590363,64.1002904522083,1.81431127344636,0.00786571741157474,29.7621475984789,7.77726738813867,110.430257013375,3.42857900180078,28.8805115094155,49.68074225…
TARGET-40-PATUXZ-01A,0.0392448562829992,0.692791284539245,141.398236396377,63.7723982290547,0.354522646027813,86.8840516361927,1968.15905754876,7258.33615332349,239.782107591505,25.3530618218264,23.9383203813282,54.1674389573749,241.591115652241,62.7421118354206,12.7488209391155,0.0676349943260012,164.541497027229,8.51846089105719,71.6073591064799,459.147055935772,2002.1054141809,596.969581153907…
TARGET-40-PAMHYN-01A,1.00296883196399,0.0187681027845729,10.4228036686171,6.26569934983412,0.00472839941850373,2.25401250414991,0.193297390819459,0.383938931546893,7.4554731962274,124.972421366358,13.2842988069937,0.319846413292196,149.413385038978,74.8039480960322,3.46462230859091,0.153157170567927,28.1518552847894,13.8151772280524,60.71012666589,2.43664998673231,10.679857304749,142.013243424294…
TARGET-40-PASEBY-01A,0.941685595342332,0.100807767644405,17.0475578462299,10.1438457073656,0.0137461317839625,5.95955610652132,0.280600152197477,0.801711510572211,18.7374800408982,143.374959229959,22.62490248785,1.10168088190278,179.084434480999,83.2256218156618,6.4724478872672,0.204598215198292,50.4950809346656,15.6552086284657,70.7608452987566,8.44737194076181,25.6804982448034,372.691068165697,…
TARGET-40-PANMIG-01A,0.588475164664826,0.00959496942958342,3.43877717727529,2.4687157632546,0.00384574799900913,1.62223696668375,0.038954594442848,0.246783215760186,7.26310477939304,126.505496998903,12.3592755540393,0.528030999112668,137.155119209491,67.2961326889859,3.7424728899026,0.0921428457796226,24.075425369391,12.0255090059525,49.1650331440195,3.02750256377814,2.00265214741543,127.95712966…
TARGET-40-PAKFVX-01A,0.00121952056664558,0.000132812133991671,1.81173816057389,0.0907556258745229,0.00186697540511908,345.950753877272,1128.39098493356,2005.7249035706,548.658904066591,62.8638962708994,65.4240231165673,0.108080934070225,169.857375428911,77.249760774834,1.04864272127501,0.000591638348912744,243.071465984731,6.3759370837536,488.281071975909,6.97185834552882,280.953217528818,16.8396…
TARGET-40-PASNZV-01A,0.00941805745436536,0.0119543440273727,8.68210668607575,1.38819183699244,0.00422622416549326,21.8912772891871,1.32453296883636,3.09931872463404,11.1713136114967,40.1890669291761,20.1860884213683,0.504170126456222,153.40438501139,84.1564643793162,5.25536486838648,0.0135220640140289,60.1319863577598,11.5981091605491,96.1054789149996,2.89358572955372,67.0445044312465,100.1856776…
TARGET-40-0A4I4M-01A,25.8568458661498,1.04051097039192,162.186107330439,13.916267846402,0.0185385028889159,4.19835439459058,0.00199329518645188,0.164166780196547,4.16116751351866,368.703614097858,21.7607964050861,0.430291386886458,157.574980385189,110.421269506936,6.66590765719054,0.698044302542847,75.1824183673793,26.7397447681149,55.0362731416772,3.15803172230137,11.5306415570163,249.1672475998…
TARGET-40-PAMYYJ-01A,0.127723169010234,0.10865664871788,91.2385904735998,10.3202248364444,0.0117041180016051,29.4734424107128,0.177535370108308,0.744929205061515,14.335191303077,238.255646934797,25.8925125596015,0.646929117311309,214.309764976984,109.253801885039,5.56559147047561,0.147239177513731,93.41694072767,19.1647635727804,102.680605611942,3.7924007865904,28.5872301556204,79.7778367796463,3…
TARGET-40-PAVECB-01A,0.087163967911538,0.160022783944916,160.194176335759,28.1481749699223,0.0764891362796462,67.9433968772826,63.1266100671985,46.7519078324294,123.777257963332,49.7675665261633,33.4826027862097,6.40466661459678,205.692911848033,74.7333221431162,12.7604287906627,0.0337530873076314,147.370532372149,10.5819439425214,74.2434455257801,34.5896079844636,396.370046279366,158.06952082199…
TARGET-40-0A4I42-01A,0.0813078039998041,0.0396894567905305,8.1833352616946,12.9004553881715,0.0179918457150776,12.5741087800854,12.2589564303416,3.72546367676532,19.0637585265476,70.8440667625131,16.9920762390015,1.47158477313235,212.588222322228,73.7641298051301,6.82262449928248,0.0474569700838834,63.047477853728,11.0049175503813,65.5261648876216,14.0114575038505,57.0224322619912,334.39652282238…
TARGET-40-PASYUK-01A,0.238811578950074,0.187135828027166,73.4345568922589,12.7830237466998,0.071319298515669,44.387078567854,4.70688748053638,13.6041953462187,56.1892002730198,89.0259812774181,37.0591979942351,4.62100795184737,140.648466601391,75.8318678160918,7.50208600927213,0.0715062920113404,144.64210350234,14.9368709997274,73.0885987036998,29.4255595414443,321.042996079092,289.738577197885,7…
TARGET-40-PALECC-01A,0.0520915059020571,0.0393985499162285,35.2020441423858,7.5881582445203,0.0259016270791297,33.0904807430012,17.5016164212272,23.3826313672601,69.2799363983254,65.8624710211896,33.1381289931222,1.92219976775526,184.030619170142,70.3184036091895,5.17318442997786,0.0406870024330507,78.9625209985846,9.2051253922438,86.2915316643325,19.7213533537882,161.325019253154,159.58326282550…
TARGET-40-PAMLKS-01A,0.00347124483490721,0.0152415277496298,89.55623210221,14.6207049486061,0.0128652764031208,217.969032066785,100616.762378905,57923248457.5555,421.8866876132,9.0752378851061,39.4001001345346,5.61864798926456,285.529681081975,92.2666410083939,10.004953850005,0.0117292494341359,88.45165969177,13.0639796370134,184.492578928836,27.8618963740211,2030.94028791583,94.584259909446,1035…
TARGET-40-PANSEN-01A,0.627355354944106,0.161974700811138,91.7106136690523,29.6107709638753,0.0291455917261187,19.4866267634021,23.0582961124693,6.2663843620515,39.7772872261652,113.606082433767,21.9048741613741,3.84850912204383,205.244928959129,76.4522353679407,9.26359896039654,0.109190154923034,116.975701039484,11.6640903631561,72.7101089885903,20.4615642542785,232.416617919365,487.786786624423,…
TARGET-40-PALHRL-01A,0.000635435933616843,6.950916594936e-05,0.102019699343218,0.516075883859132,0.0022635433576517,283.077400896017,2138.58915570856,10087840.2235039,944.077386502983,41.122813267227,38.7696158680521,0.1600383450657,247.728411253771,66.3943619456832,0.858421920605995,0.000486890645735785,168.749953192958,4.31339284508136,483.163513908976,37.7761017447998,541.75926451113,28.339855…
TARGET-40-PANZHX-01A,0.0444355038832867,0.0164854900215417,2.8772610853879,3.54698385617033,0.00992859719200379,25.4855383925475,42.7170933337095,9.75791221397054,73.7310249885685,102.052053958406,29.2195866931889,0.613446382539961,185.785899650388,81.6443843678631,5.3341636485651,0.0140734742273375,77.1651433869924,13.5208871240482,166.858523724096,13.6380165902987,145.835573758895,193.575644367…
TARGET-40-PALKDP-01A,0.0432056133001722,0.012126409874465,114.032801677461,6.9454664386202,0.0131658460969327,62.119209123675,256.716680435798,24.2657569457614,109.963987489081,60.7934013574746,20.5611315912705,2.8382923210898,261.8170359766,85.1747636159218,4.3822450715435,0.0110050917394428,234.649118273206,9.07579940525742,138.085600966496,8.71006053226452,800.17308705377,67.8393397272946,227.…
TARGET-40-0A4I65-01A,246.464238804503,0.0336258193984652,3.22098920042042,1.8125308209194,0.00190783513831951,0.0387973676040182,4.06019301204131e-07,0.0153721979152113,0.0274095957249915,645.522463814865,9.9502877712642,0.0268872735480161,144.346337361826,110.6382013077,2.59748122606154,0.635862570806742,17.082473946452,30.2901683484368,42.2965334172514,0.594349959721005,4.14075080077519e-05,155…
TARGET-40-0A4I6O-01A,1.43777565032385,0.1461018457158,102.645798755793,24.8403273208614,0.0200365311044881,22.3085238504973,1.43926020455012,1.5838937733444,26.7170242105583,265.855106642302,15.2162335772048,2.49374188719657,157.624210849329,73.489457918397,11.6342589351296,0.281878527178745,194.839654320547,11.9521084317298,69.9907231208148,11.5419808897741,106.883432410537,152.847046704165,55.2…
TARGET-40-PALFYN-01A,0.0276983348941231,0.842508787996425,424.489181023736,107.817695589535,1.53812547432513,239.565351607829,9041.37624528787,NA,609.689699974872,15.0129194473854,55.6136499836092,109.804876746186,257.331425410299,61.0084792171576,21.7158445109612,0.0424185412871031,183.365196336555,9.10128917235478,91.2282301838977,3273.25623589566,3587.56832840403,579.17134617928,1233.440772032…
TARGET-40-PATPBS-01A,0.0187589277463714,0.0109187930647242,13.56221850366,4.33812183897564,0.0260057591973887,57.5148879218318,198.784692617166,152.523772753081,98.1917957478415,34.9102374088932,22.3553922875205,4.04193320158755,187.480471619741,62.9567359746225,6.59080876506668,0.0166308575007634,85.1457170155959,7.15867143550155,100.209845460927,20.1286287236221,649.701518991428,186.88761445377…
TARGET-40-PAPXGT-01A,8.53888697593944,12.7757162034344,1286.28796037816,75.5536974051468,0.129306902380432,63.8601228580606,0.0916951109748694,3.05731957917573,45.8488691772387,614.774386650527,89.2989484215631,2.72812291869039,212.240142179825,137.142222883207,12.8906851251609,0.202547044745733,545.173929406782,27.2430683993206,143.8184295531,45.4541828494597,770.868867081175,1680.98292253903,73…
TARGET-40-0A4I4E-01A,0.794442327375183,0.513389829188765,116.611934537443,16.5529254761418,0.0119284833772844,12.6537890317318,1.6932665986171,0.935500564492186,17.0336487705341,124.133401346354,12.273073130216,0.671684128449101,232.264446516897,98.6158324189897,8.40673518552494,0.244329510823134,52.8265551767385,18.6248666100213,65.9937832636483,5.39853371334632,28.6139195476972,130.111462654581…
TARGET-40-0A4HLD-01A,0.105181522907492,0.597343005395091,115.387931017715,57.2559431078428,0.251631337165825,33.6268284982321,431.583697313101,344.813445842921,180.652749910831,14.1757508790714,18.7569477378684,55.3596595406277,195.014602378304,55.8336265997154,11.8674867923703,0.256986851219983,48.8557084788385,9.89552601067245,47.299853864089,138.713638239637,595.932228059389,399.471168074716,2…
TARGET-40-PAUYTT-01A,46.2725543196594,0.0480787482894687,6.48199907580219,2.97598018859676,0.0033103816910982,0.0875822265220577,2.46239049279797e-05,0.0376496971402329,0.521065543827969,293.281450650159,9.16765597829205,0.160616579571718,128.067891847051,86.8177627382214,3.49827444983083,1.60033659261494,15.8288663223619,21.8874924107405,35.6453308877961,0.960242845714325,0.00581231903423382,117…
TARGET-40-0A4I0W-01A,227.459304719779,0.0123801991742941,0.832563277572251,1.44460188975003,0.0018314556193425,0.00179270182009032,5.12792117512823e-05,0.0185145819337597,0.150359810130642,372.833223534203,6.08127126887198,0.0869987056442037,106.44972977315,70.1641962539113,2.36003958866356,0.675752727194533,5.4813607704895,19.8199962396768,28.2071747860014,0.89936225237283,3.18816488397531e-10,1…
TARGET-40-PARFTG-01A,0.0292970634708593,0.864813637303902,3148.95136189174,58.3190877226251,0.133222768167324,298.372312344238,1158.75700654642,34770.4029534021,228.9303198826,40.9751143251967,48.9225245208838,10.2201371146143,211.751997297827,91.0126477109231,19.000598697573,0.0350600938571029,359.90357191689,11.9239079819147,155.179897783051,47.6566575971842,2044.23806520835,104.555085227065,11…
TARGET-40-0A4HX8-01A,2.67097089487268,0.240117495195626,71.8630390593787,4.80250513008261,0.011152798727391,4.12277386515236,0.0029596793173817,0.198121124677562,4.06346572829893,121.730212002365,17.0469083421776,0.352026209711432,201.533640709122,125.75655102416,7.09367665731976,0.620018968965746,51.6135849933459,25.0323666647332,47.4140735291614,1.44804283425862,13.3188870021001,77.037230692559…
TARGET-40-PAUTYB-01A,7.17750546879704,0.0116505774126974,4.16677450202444,0.35952927859615,0.000854673371954587,0.0213684666291876,2.42180717533864e-09,0.0120556481620771,0.000260430456241344,566.909677418035,9.87180819836052,0.0074012729112461,103.662355562197,115.005283792697,1.11257885018393,0.192678487060577,10.4672352025949,27.51954661185,46.6745401733376,0.301619409997626,2.65914016749624e-…
TARGET-40-PATMXR-01A,0.0899910604954188,0.0343188017568896,66.1821717342246,8.10402348877523,0.00983293999547697,14.6049872810615,0.523062319565188,1.72525564767634,8.00053089861478,59.767820472965,15.353036310351,0.525240856916429,176.373685853526,76.4805007462413,6.40979321504044,0.0808258871575397,51.4975486300223,10.6505305103713,65.9031523352371,2.8715295450865,24.7264768456836,86.6714247770…
TARGET-40-PAPKWD-01A,0.126670559047039,0.0322249205920022,36.2396107046141,3.88439206765715,0.00397732361873848,10.6551228265485,4.1577016888734,1.05557483241454,16.9458832542569,52.3032444908676,13.4921014205994,0.6951381221399,179.254545443178,92.4426634376043,6.70478114219707,0.155858293811958,64.4439132369814,17.3211181713544,83.855478306289,1.92461328968732,121.349842898717,75.4466521553858,…
TARGET-40-PAPNVD-01A,0.00797350717340171,4.20157140841543,1308.27964768508,104.945665818912,8.57042691172712,283.136564114561,22468.8843026766,NA,592.712692492702,5.71001881438428,39.0949275504471,498.798761963175,289.195683571903,63.3697248595313,23.9426415301624,0.127895555875022,271.751736563536,7.93471187809311,70.8742822416876,9553.14888859225,7026.87025579808,471.18361712792,2397.8193604121…
TARGET-40-PATMPU-01A,0.0346680641831774,0.0209977111490802,50.6061124333426,2.08943955981529,0.00751224656557282,31.9002425857396,6.20893339311603,6.47491946781914,21.284142713477,26.752010492805,22.4128317317312,0.748194065826209,190.534478505234,76.6406058699744,4.52706195702172,0.0217629624430441,84.119607434417,9.0104959157587,85.1656816657622,3.56368141763567,164.055134797917,96.591186571987…
TARGET-40-PAPFLB-01A,0.00230988204546728,0.00140453070829199,3.78934964106156,0.633460867573432,0.00253133434423209,87.7087068845888,191.854551488589,134.360979697092,125.203119320822,17.9522048727391,17.6189088658974,0.48913969900836,262.007716332137,89.1431406611899,4.28261570698319,0.00859226561969369,101.67730218289,10.1448512973366,178.407520252253,3.90508754487305,445.731759317709,41.595060…
TARGET-40-PAPIJR-01A,2.06438656223475,0.0298109282134736,21.6450113699779,3.75829503268303,0.00857669734065115,4.88961731995036,0.0751650626392696,0.30969618997817,8.35571943023738,336.784426073326,23.7452808708962,0.204894109287635,159.961363374057,98.3476101972704,3.12331921533589,0.103843885280186,74.0303167681943,18.9099369149375,79.208021272679,3.26916796366655,25.459956712525,136.7009177638…
TARGET-40-PAMEKS-01A,0.00499053452855074,0.00720295594060565,61.5268075344912,8.9356559359973,0.0133822816424944,192.019080718267,11497.0796201485,2458622.35981993,154.420856421947,7.95401948240601,39.2292795638047,21.8785167469043,243.189495748717,60.0200107551638,11.5560450446917,0.00187437667913205,266.93082289443,5.39544248633624,125.130324334362,36.2380132893102,2582.39951476402,83.296474660…
TARGET-40-PAVDTY-01A,2.97898097210741,0.0233412243454553,23.2922055390321,2.02541489713602,0.00301941625763412,2.03574861865702,0.000233712356477153,0.0919814038383595,2.14907651191711,308.178320406664,20.1684146871319,0.0694380283834249,142.108483038255,102.36772430676,3.39690056452859,0.251700873589146,50.2247671307392,19.586219529321,65.1276626837866,0.90636071858844,1.42371973346065,58.866001…
TARGET-40-PANGPE-01A,0.0813134964883094,0.00630340587255571,5.6253010147786,1.62270735849164,0.00548513006524222,19.789564637066,0.304971929071674,1.06121773489445,32.5485340079014,182.576004816682,35.8123212299101,0.292158585183068,183.795457616394,90.2256486388094,3.47568865171909,0.0173861305650421,113.459989109232,11.4751318662257,113.578794549355,6.60337979924861,31.6434980402821,129.3554484…
TARGET-40-PAMJXS-01A,0.00255847193047918,0.00172666619689466,5.70142996350796,0.661200599856782,0.00469426407381038,109.94031959506,626.781581256449,315.956434256864,93.9921905936804,36.8146435526439,32.8203455788164,0.188988633638707,308.416839190183,81.3165401942167,2.76469506500642,0.00228884051792622,150.839441439867,8.19171842159773,316.122506090649,5.2544558991316,862.172294924652,65.097232…
TARGET-40-PAKZZK-01A,8.95534900759271,0.230967673700465,113.880194616721,8.12256212669968,0.00868146122428304,2.5320472122737,0.00169378751835572,0.162932368864889,3.58414201832856,208.546849845608,15.2903041818328,0.313106412450402,140.030736722915,99.4399355159026,5.71608173355635,0.752115935441471,61.3681805587834,22.9994781239983,54.2367936938158,1.75704034805409,10.6946034216103,113.57302904…
TARGET-40-PALWWX-01A,0.0127680374371417,0.00205849439770729,1.87453649486626,12.0284205891378,0.00694244644961921,231.658521400808,4121.36824713327,68388.2411597981,617.868943355874,269.738328679739,73.2260429548814,2.09341283701191,415.174965201872,95.984587755043,15.8493423146603,0.00725410404438221,716.470527206936,14.149817747691,500.576372904562,74.464928338942,3655.11990284892,290.841144477…
TARGET-40-PASKZZ-01A,0.220679559461635,0.0266724789740297,9.16129344112481,4.89307473771471,0.0091936065982262,4.88486939287365,1.21384999295121,0.864555654578391,11.8523590131945,49.5011610694834,12.2742013122057,1.43495687647943,161.240659688548,65.8772215048147,5.56307560568592,0.0904545469324816,23.3903619776757,11.0634774668236,44.3014677348943,4.94810168411549,11.2036770901488,112.386420522…
TARGET-40-0A4HXS-01A,0.00218139977144715,0.0171902380006569,8.13436267544074,0.73316372944085,0.00723671376818554,135.778647938333,188.982171092544,14.9957837400569,55.615551436579,37.7053096705485,35.7986890558911,0.702445313025597,220.527666961752,106.67274356765,9.28642143700478,0.00965152057479624,43.8544748800605,14.6328554349697,168.283625210528,10.2057771946444,156.732966800659,29.61117395…
TARGET-40-PATEEM-01A,0.286730406613628,0.0350900840566391,27.3706222678767,9.86775637493707,0.0265289199976205,24.6660323598613,6.48695562958427,5.94173425493764,39.3500504740819,69.6257217061606,16.330404351011,4.11206857855051,187.920249880666,81.4300961962716,13.3057876288896,0.138949541549626,105.380876760321,13.5274145743826,75.9734049263491,16.7694860723219,151.137165944656,256.532342738811…
TARGET-40-0A4I0Q-01A,0.0566219100583668,0.0888763303364325,349.870547893671,18.5839501501401,0.0121325302288577,94.4403360107694,730.653037006091,85.4357983278171,82.7299117596976,72.3656543260288,17.5724323853943,4.07841019344649,173.749687261017,72.6282696161977,9.96224268584029,0.0367893525955497,187.727397360269,10.3262709026329,102.052982057068,15.2027596216545,508.340240208601,71.3074718622…
TARGET-40-PALKGN-01A,0.10329984475031,0.00442251587924242,4.2020349485944,3.00518062105626,0.00454978725508617,21.595620529871,4.51524620540915,1.37205030986643,29.2086908407681,146.863908852945,22.8925878499865,0.133603963880835,238.711632056056,95.6011508730174,3.55340481418183,0.0148972616207096,77.8945793906008,15.6293666761557,141.433933635181,3.49799190496218,38.8263140750731,47.93607069120…
TARGET-40-PASRNE-01A,0.132711269917517,0.0134298805657619,6.05585131053298,2.74540659274961,0.00700823376793295,6.43691880102035,0.43558243544265,1.03279701424128,15.6176647777609,47.2800749769667,17.4397498509832,0.789218068032197,153.895933043562,71.4422018040199,5.65777892974529,0.0848870983332254,32.9049011794987,11.6565922509534,57.0156317474468,3.3192856336675,16.6116258078626,120.096918804…
TARGET-40-PARGTM-01A,0.00846801644729619,0.00369437571534778,16.2953405951398,4.55188938357763,0.0243107375025571,113.602787182598,2591.70367497678,13584.1727862216,230.059135453799,28.648512751081,35.9490450204542,3.83311529985486,239.417585026849,65.1333143158902,3.80633127992756,0.00707706111152041,152.303834891417,6.15720305597011,172.305393640682,28.0763064465075,874.8811173296,102.974505206…
TARGET-40-PAUVUL-01A,3.78762571966597,0.152084939578214,35.3680430882648,4.62541460425616,0.00642035048403677,0.918259106171154,0.00145529934659315,0.114265091885784,1.46505794707779,122.20201086087,13.0410130337894,0.29083591558621,145.790361799287,86.5670730008829,4.0883967565775,0.771231352983516,25.6781277048681,20.6568323903236,41.2613003325487,1.1995808665472,2.17736044349928,93.86831571995…
TARGET-40-PANGRW-01A,0.459967498316421,0.0232688885067589,5.82295174218952,4.00230255025415,0.0104876350050502,2.42464542531496,0.435315909262637,0.600498802435251,15.4796654940163,61.7204949557727,12.6561540042077,1.47737205551729,145.176359648306,64.3334185299242,4.3304997732954,0.203971970665792,18.2231582653075,12.6792060347747,44.4159041710225,5.66244730418344,7.75498889551585,162.5517057682…
TARGET-40-PAVCLP-01A,0.454227513257703,0.0292931218448491,26.981989495236,1.87873120086445,0.00371162857559333,5.97619865870241,0.00082362380491292,0.19158496988358,3.456773359872,238.10167948136,24.4656388592794,0.149959588663356,151.888812773183,105.744078809705,3.92397145852812,0.0895784760577005,68.7544858534767,19.6827526030959,83.9701315948549,1.74077427769952,5.59018207206864,65.7666143575…
TARGET-40-PATAWV-01A,0.0179906377449909,0.0200407239944201,63.3948283035159,3.96178613411688,0.0534139397501961,113.957979820756,763.284899586941,4162.53755771426,182.185238048684,14.5646217826165,23.2216413320317,7.70634565477399,238.986866532013,69.9000185214099,12.343793229875,0.0349481023613233,225.977098101852,9.66693210227454,130.81143468514,29.4698843739905,1538.10309355758,150.06461398282…
TARGET-40-PARBGW-01A,0.439969200386242,0.0816713469399042,63.3069544568365,5.31219786757922,0.00844931343262484,6.54732097521716,0.173063853469529,0.408821269343393,9.0677542449503,120.008025879536,19.3215747322804,0.630674806182312,151.982371160092,80.1467568707505,6.32363771867006,0.131589286824219,38.7551895275471,16.0061737410352,54.8367740234955,3.51359648458726,10.5990293912808,160.79123739…
TARGET-40-PANXSC-01A,2.93943544830481,0.0849427014230956,156.142279967747,8.31271142571563,0.0103629146271089,11.3563459823395,0.00658853501069409,0.314785213406589,12.1345470060085,421.222290341635,30.6055559550586,0.262550298351318,163.058033015134,118.638798238487,4.85211873570629,0.230827374114039,140.655798919465,23.9457635312355,89.1762809474826,2.57816680056348,46.0200101986295,139.7579216…
TARGET-40-0A4HMC-01A,1.64802006007057,0.0365476049857012,21.1878911076786,3.25214337030515,0.00705763825254783,2.42662544637138,0.0490991108021083,0.294728149984913,7.13722259257249,210.02254761711,19.9843229276012,0.20823392635094,153.594280672574,92.4343181099366,2.29110692404636,0.10302034856497,49.2291522560349,17.8786501154031,63.325262915948,2.56864112818217,14.6488022054311,108.36659291639…
TARGET-40-PAUXPZ-01A,468.426261943585,34.034798005033,7764.61760881591,16.9468292506287,0.0149246938885541,3.40600100694377,7.66753999040352e-06,0.0678335729632251,1.27338980469198,535.290305760718,24.3823132467796,0.254747650613901,142.613583878334,137.486808760808,5.74442887330812,3.33149305934211,127.2432227213,34.5575603825005,55.5990987892994,1.15217994366136,16.3951812216742,91.123745446444…
TARGET-40-PATJVI-01A,0.00772521274824712,0.00599467763672131,19.7984325619057,5.32799923632675,0.0157781270519555,280.151381605648,1853.77752186234,17803.7937585604,284.379448787642,48.4742588822097,31.5395716073863,7.24948436352155,277.814737020745,89.7321686483837,20.7181273620833,0.00507217838222622,314.353275064152,9.30746673966467,301.789339235374,47.843099773601,3582.13316211985,172.9778575…
TARGET-40-PAMRHD-01A,0.0324733893537062,0.00189903999253396,0.24451436899987,0.334637520910734,0.00258886033731964,1.24975663882519,1.48120304592772,0.580551653452308,5.36550890103071,36.6362633314502,9.2619472852028,0.237357928132388,137.263866396211,71.6602839818569,1.4159561522111,0.0152945836925131,9.11428518770837,10.2062204220169,60.6813874627167,3.17344690820374,0.666553456699934,96.543809…
TARGET-40-PALZGU-01A,0.0122240055721014,0.0168569825667287,42.9210240828085,3.08413862640374,0.0060681833018094,117.136178054856,15.9065485238799,29.4414448777508,55.9770256029657,72.0260881494745,23.7453556893847,0.190177479352121,257.422584970112,118.244074831786,6.75608889807545,0.0161959636517241,200.815013951971,17.4874864821988,225.279462926979,3.28749244942135,177.894899780616,64.011570099…
TARGET-40-PANZZJ-01A,1.3638830662913,0.0643254008465601,30.1516611180004,5.99475498740598,0.00708397686028005,3.61632143650251,0.0240043539104037,0.297830364782685,9.15507662012815,184.269667750232,18.1758190963701,0.453869045769612,148.024926713851,91.1629419318159,4.48250772787012,0.271121863187077,51.7584394528302,19.5554948426055,58.7075905745471,2.88053286510149,8.66116734595429,121.14471445…
TARGET-40-PATKSS-01A,0.0971322987080086,0.017874509117475,26.2188235224777,4.06430735715591,0.00465725840662696,18.3338141607658,2.49611352560592,2.31017498767975,17.3626777693309,33.9767681144744,11.0226303785459,0.469718128663339,222.298321368749,83.8313262345811,6.72513497478826,0.100309105664474,47.6804271654587,12.4514855244652,59.5586797124698,3.73898923248732,48.9097520671919,67.4568936399…
TARGET-40-PATMIF-01A,0.133981967227534,0.065978926319799,29.637202100354,18.8368367156429,0.0278080593592386,47.8786716458785,20.3083408399275,18.9546341378399,62.0796009179782,92.8591110134764,39.540389646443,1.20463487274766,215.017577595112,81.8500907902074,7.70064799671865,0.044943696172029,144.234729499891,13.186643735124,121.490704423603,14.6234789935424,356.034622993055,192.181245269768,10…
TARGET-40-PANPUM-01A,0.0036498811994536,0.00420533937050519,6.8777096070506,0.747549554093967,0.00511369546889149,61.7362319647774,5245.63747413002,284.633393586142,109.736568998353,5.33338610963298,12.212428968291,2.33530394453568,220.530527647762,84.9350751175808,10.5913341393491,0.0115367532505593,40.2760021923124,10.8869467427101,109.188820825807,5.32479050899919,387.634294463855,47.109943630…
TARGET-40-PAKXLD-01A,0.0164679706612576,0.0563559308343026,177.053406907224,36.4556977464495,0.0383860389027142,87.641916294121,19963.0451391603,75522.7989431632,481.771511763928,27.1594060577796,17.0691332120384,40.1609621513022,237.471445374452,80.1921023694154,14.4383667997352,0.0442802795496641,122.032047778108,10.9053804719284,102.918464521796,94.6211866563343,3338.97521806361,382.1504169459…
TARGET-40-PASSLM-01A,0.00386813545832556,0.00242571446326635,4.5216549976575,0.73994101596194,0.00592336994953592,112.67936691681,14.9810331324033,35.6535260982783,74.7770422794627,19.92056554286,28.8633186873778,0.641825462488247,279.07359750124,98.6718428242217,7.09943361439014,0.018386904620983,157.929838907697,8.4907698089334,126.329925477687,7.06406792936885,230.535395384193,56.8220021911078…
TARGET-40-PAMTCM-01A,0.0146014779465306,0.0150274919155283,43.8263227348665,9.91766381055742,0.00982976159153951,58.8212719621791,729.988802762352,392.468321108926,188.465889854802,25.2240705345454,25.5622242575011,1.9445152734865,246.844942452327,75.0251804547413,7.52909473383477,0.0422953164338902,98.5970883086018,9.97374212973209,151.207592622673,7.81980760853493,469.801123940863,77.9382730465…
TARGET-40-0A4HY5-01A,0.04082601944219,0.0118195620291,15.7329688241098,5.79390281626914,0.0039647595928142,45.795265345131,54.9744907415402,5.83793003338534,24.7504034944663,43.2212757312559,18.6632873124487,0.922986072412837,228.219519591955,88.8204961630057,10.8989012837847,0.0269484494674199,90.6909010784308,16.7854695787474,156.855478846945,7.37181495674818,210.072491372959,51.8697804868205,4…
TARGET-40-PAVALD-01A,0.273197615319328,0.0522743980078159,29.5600125688387,6.74402167120482,0.00560729593758869,15.0001113815865,15.715389644283,1.63892960979763,21.1810327847277,53.4879667004789,12.8460478431719,2.36117375799871,198.9230794244,80.1762637975724,9.66495864554419,0.145717103724392,54.3731924019274,14.720080933779,62.6336722348258,5.58594274040918,73.6388411878174,131.716493444845,1…
TARGET-40-0A4I8U-01A,8.41112085651612,0.0704571854200891,54.1553698383868,3.58042552644674,0.00498096776012878,1.46495617676733,0.000342276315733151,0.0927879049151895,2.12561561187428,289.117577136466,14.1384249110662,0.148819046529487,127.780272427387,101.8457659722,3.56431098778093,0.650564035020093,41.788870191211,22.0232970833309,52.5604567549046,1.05214334318247,1.53123731082517,73.46568527…
TARGET-40-0A4I9K-01A,0.0277948834308717,0.0115076599841928,25.792250124993,1.75470915183602,0.0137092221956363,56.376869681149,19.5032005041181,48.3715197748965,49.7352851159424,46.9596472923216,33.23116541439,0.921780208053444,236.412711617907,130.585615330302,3.55648811434672,0.00389553797316202,89.6192054683506,11.1745606731041,331.016722037178,43.0074538722533,360.144311885515,85.990611436078…
TARGET-40-0A4I3S-01A,1.40726604114783,1.09394531928998,180.199457133404,41.4985482753442,0.122441427268151,47.5268378057439,21.3706624447562,7.55903997863992,75.9018957694834,136.591318107969,28.0465079706274,8.08213505953719,227.940242744562,94.8677975667393,17.8521215717429,0.268207953465594,173.911085200437,18.3961243436843,71.3042128870979,83.2232444577123,322.340660754809,368.317918399351,48…
TARGET-40-PANVJJ-01A,0.107504257495401,0.096984681730975,73.872122697583,30.2028899435207,0.0822961384633239,62.5331917655293,577.237547602645,310.096441245033,182.619914077335,32.5901219295333,32.5343573156441,26.164537179755,209.088938835338,72.6469685289704,12.5478932268731,0.0392716011193303,147.559150797106,10.676979868566,81.6433492401209,297.799369269609,544.332260427652,426.632034639649,1…
TARGET-40-0A4I5B-01A,0.0389122233863703,0.00743347482541511,8.03402668318282,2.12761052408916,0.00650754320206645,18.3217938012306,5.63682140865797,4.01586323746359,24.0738385127305,32.4224536789047,23.2062331906838,0.359136454787674,188.758861521039,83.7274592152056,6.10358069407176,0.0369817050376678,94.0356212404965,12.9346393454206,81.8604365833265,3.25989020066769,93.5661394257007,70.2107488…
